# Supplementary material for: Satellites reveal a 28 % drop in Ukraine’s Nitrogen oxides emissions during the Russia-Ukraine war in 2022
Source: Copernicus journal article supplement (doi:10.5194/egusphere-2024-3672), 2025-03-06
Supplement: Supplementary file 1 [file egusphere-2024-3672-supplement.pdf]

1 *Supplement of*  
2 **Satellites reveal a 28% drop in Ukraine's Nitrogen**  
3 **oxides emissions during the Russia-Ukraine war in 2022**

4 **Yu Mao et al.**

5 *Correspondence to:* Fei Jiang ([jiangf@nju.edu.cn](mailto:jiangf@nju.edu.cn))

6

7

8

9

10 The supplement includes:

11 Supplemental texts S1

12 Figures S1 to S15

13 SI References

14

15 **Supplemental Texts**

16 **Text S1: NO<sub>x</sub> Emissions During the Pandemic**

17 The impact of the 2020 epidemic on NO<sub>x</sub> emission reductions in Ukraine was relatively modest and  
18 transient compared to the effects of the war. The widespread outbreak of the coronavirus disease in  
19 Ukraine in 2020 commenced in April (Malarvizhi et al., 2023) and was accompanied by a notable  
20 reduction in emissions, followed by a comparatively smaller decline in emissions observed in May.  
21 The industry sector was the most affected during the 2020 pandemic, although to a lesser extent than  
22 during the war. A 15% ( $\pm 3.3\%$ ) reduction was observed between April and December. Transportation  
23 was the second-most affected sector during the pandemic, exhibiting a greater decline than housing and  
24 agriculture. Energy consumption data from SSCU indicate that Ukraine's coal and oil consumption in  
25 2020 decreased by 6% and 3%, respectively, compared with those in the baseline year. This also  
26 corroborates the impact of the pandemic on Ukrainian industry and transportation. The seasonal  
27 fluctuations observed in the industrial and transportation sectors were more pronounced, with notable  
28 declines in emissions occurring in April and June (Figs. S7, S8). In contrast, both the agricultural and  
29 residential sectors exhibited a return to similar levels of emissions as those observed in regular years  
30 following a significant decline in April.

31 The NO<sub>x</sub> emissions in Ukraine during the pandemic exhibited a stronger decrease in the western  
32 regions, although the relative difference was not as significant as that in 2022 (Fig. S13–S15). The  
33 observed changes in emissions across all sectors in the Eastern Ukraine and Western Ukraine were  
34 smaller than those observed in 2022; however, the reduction in transport emissions during the Western  
35 Ukraine epidemic was comparable to that observed during the war. This can be attributed to the fact  
36 that the epidemic did not result in a significant loss of population, and that the home quarantine policy  
37 implemented during the epidemic reduced transport emissions while suppressing the reduction in  
38 agricultural and residential emissions. Compared with that of 2022, the impact of the 2020 epidemic  
39 appears to have been more evenly distributed across the different regions of Ukraine. Emissions from  
40 the industrial sector remained the most affected but decreased by slightly over 10% in both the Eastern  
41 Ukraine and Western Ukraine. This is partly because the industrial sector is the largest source of NO<sub>x</sub>

42 emissions in Ukraine, and partly because of the challenges posed to industrial production by both  
43 epidemic and war.

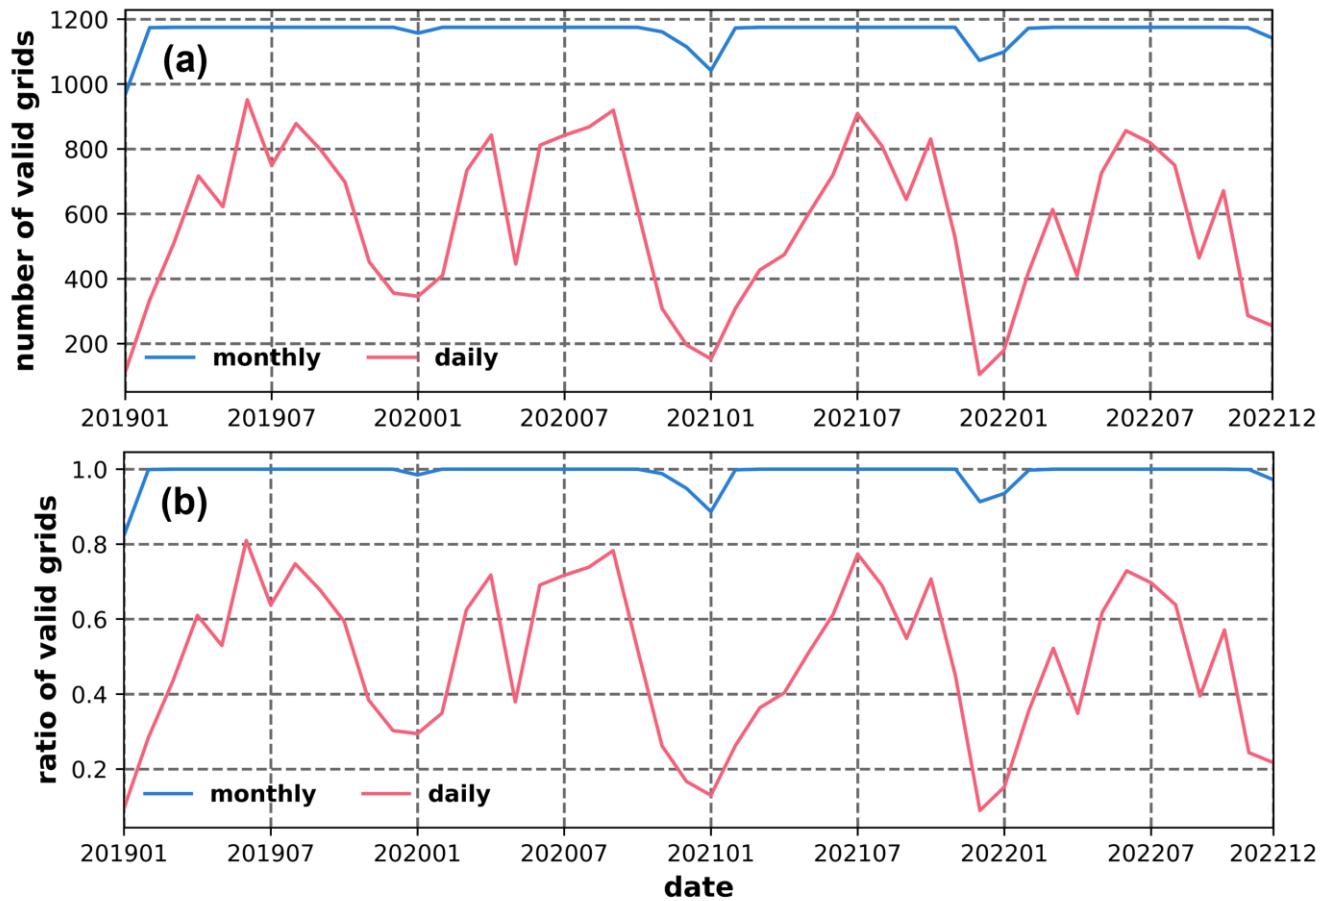

45

46 **Fig. S1.** (a) Number monthly averages of daily (red) and monthly-scale (blue) valid observation grids of TROPOMI in Ukraine in  
 47 2019~2022. (b) Ratios of monthly averages of daily (red) and monthly-scale (blue) valid observation grids of TROPOMI to the total  
 48 number of grids in Ukraine in 2019~2022.

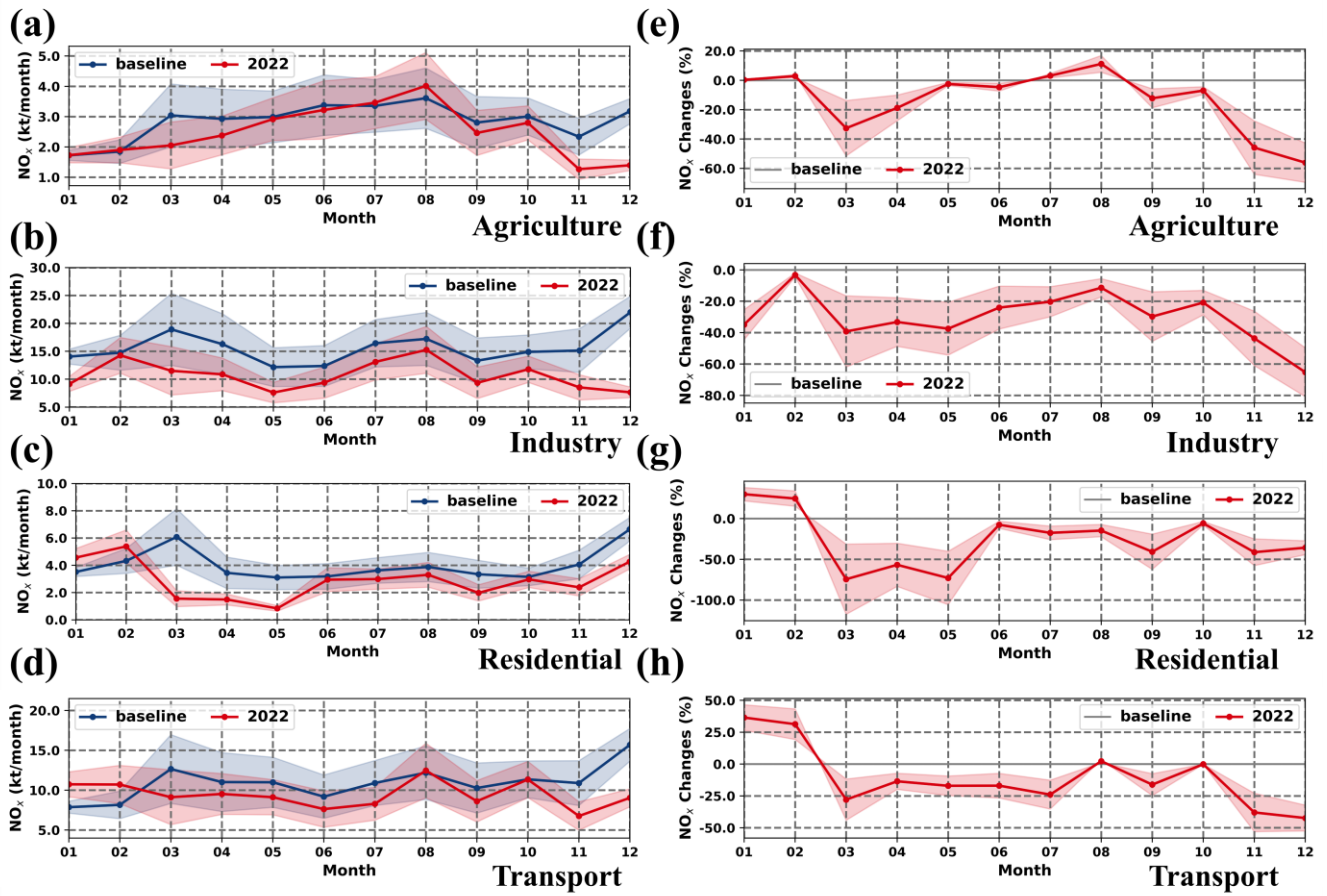

49

50 Fig. S2. Seasonal changes of sectoral  $\text{NO}_x$  emissions in Ukraine in 2022, and the relative changes with baseline year.

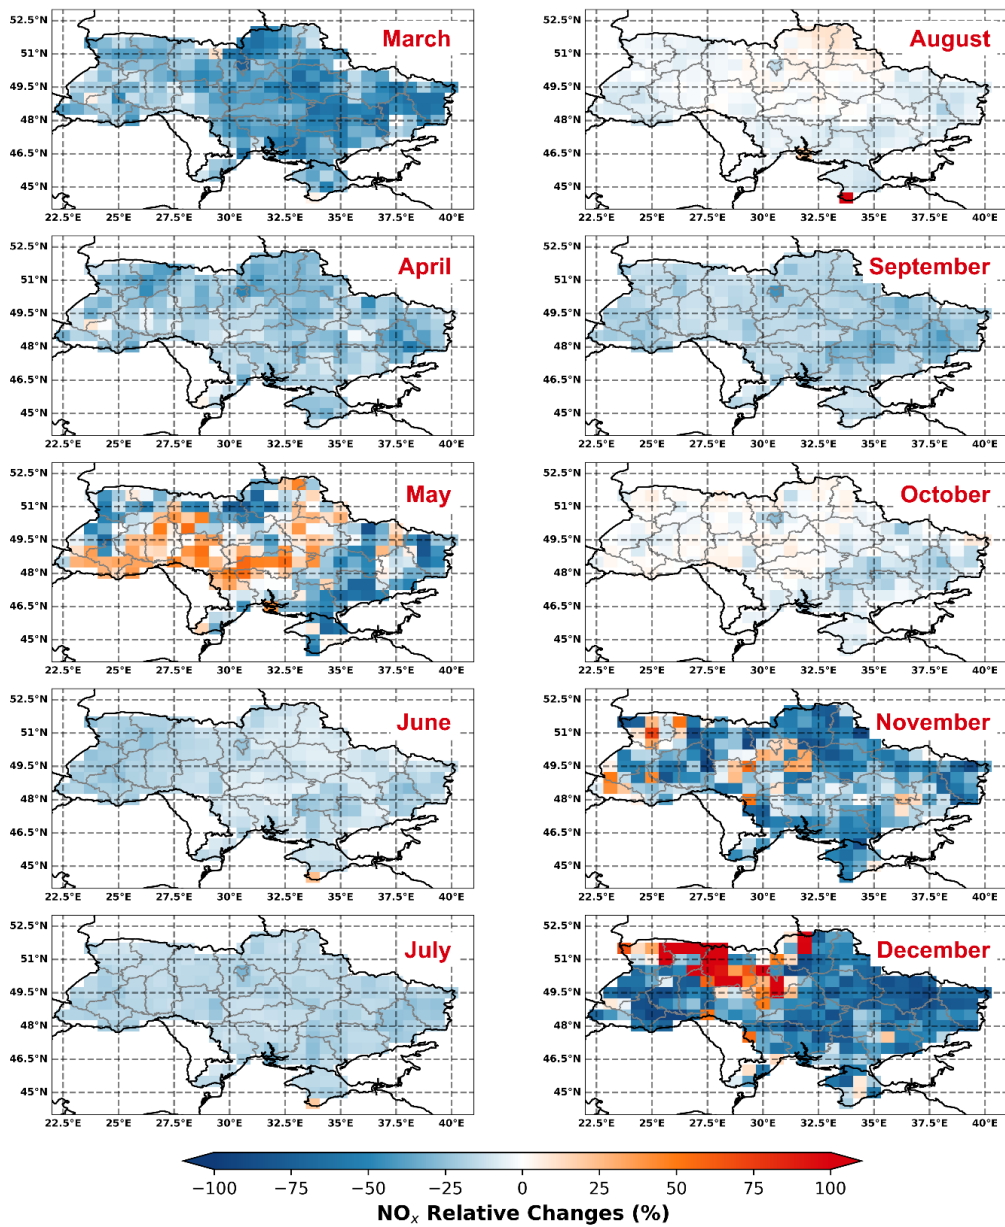

51

52 Fig. S3. Spatial distribution of monthly  $\text{NO}_x$  emission changes during the war (March to December) in 2022 relative to the baseline  
 53 year.

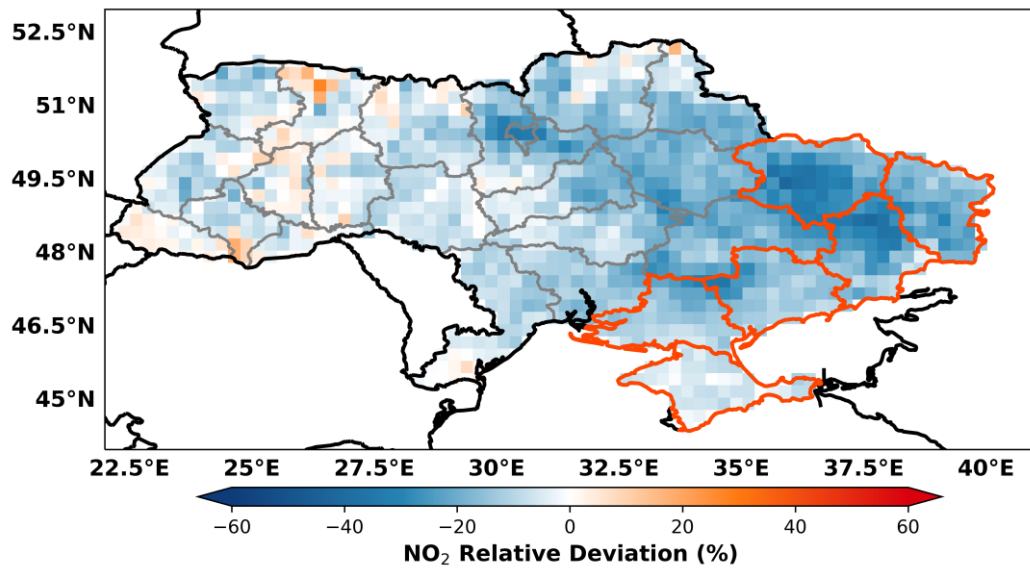

54

55 Fig. S4. The Spatial changes in satellite-observed NO<sub>2</sub> VCDs are illustrated during the war (March to December) in 2022 relative  
56 to the baseline year.

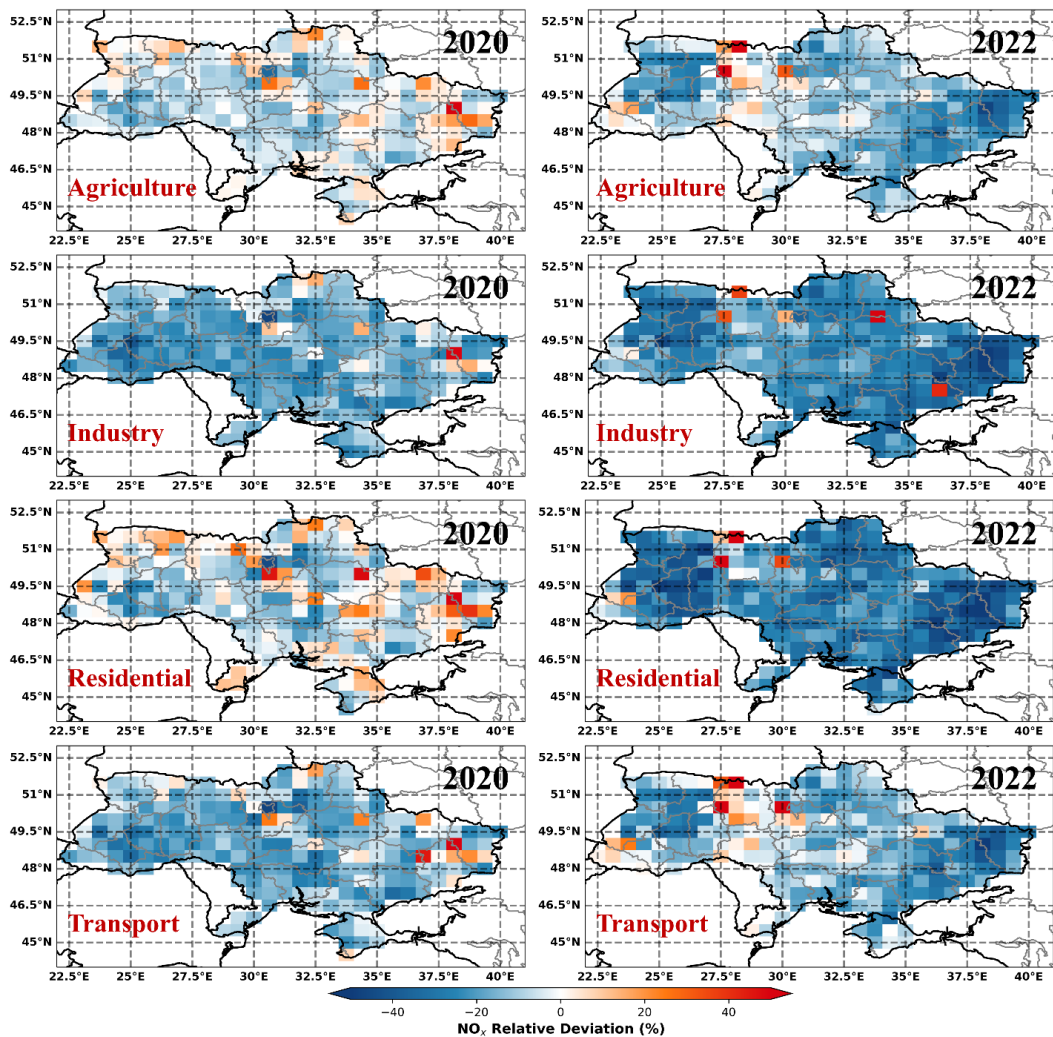

57

58 Fig. S5. Spatial variation of sectoral  $\text{NO}_x$  emissions in Ukraine during COVID-19 epidemic (April to December) in 2020 and war  
 59 (March to December) in 2022.



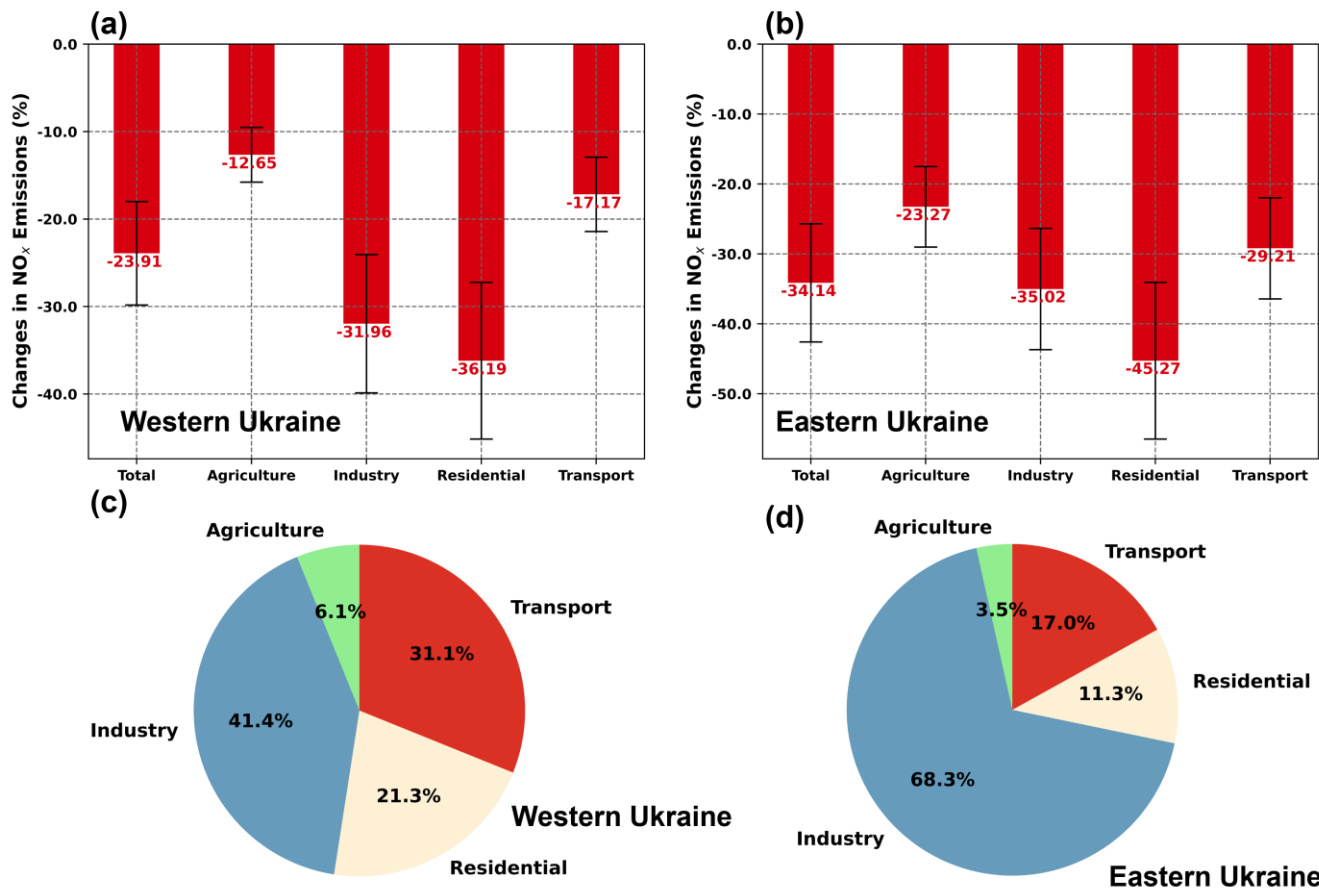

60

61 **Fig. S6. Changes in sectoral emissions during war.** Relative changes in (a) Western Ukraine and (b) Eastern Ukraine  
 62 sectoral emissions in March to December of 2022 relative to the baseline year; and (c) Western Ukraine and (d) Eastern  
 63 Ukraine sectoral contributions to the decline in emissions in March to December of 2022.

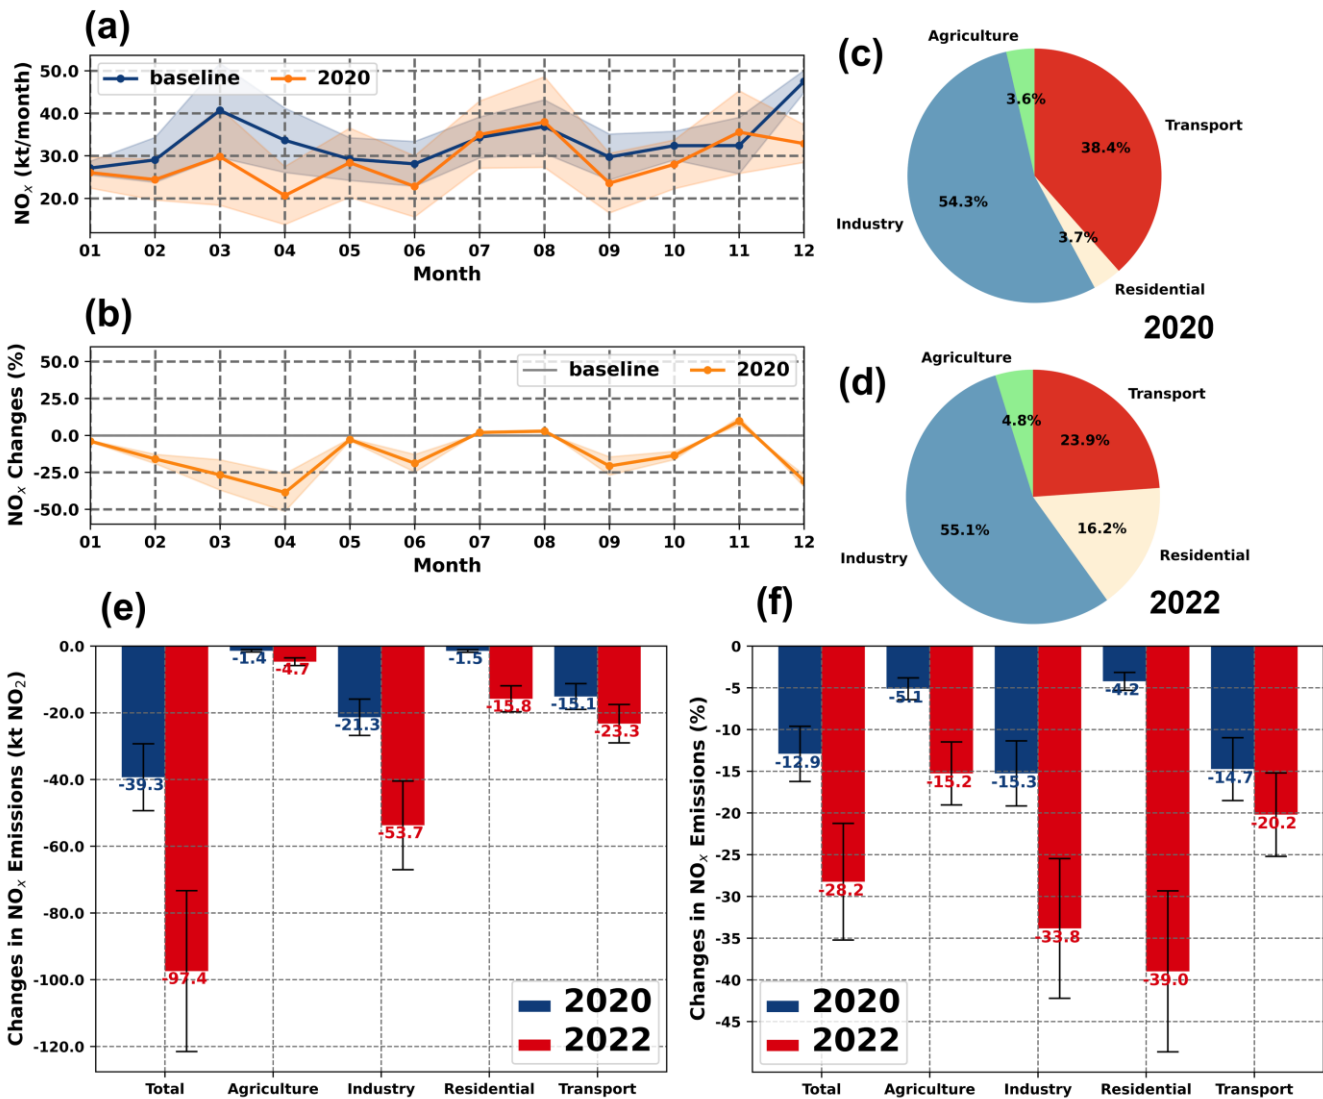

64

65 **Fig. S7. Seasonal and sectoral NO<sub>x</sub> emission changes in Ukraine in 2020.** (a) Monthly NO<sub>x</sub> emissions in 2020 and the  
 66 baseline year, (b) relative changes in monthly emissions in 2020 and 2022 compared to the baseline year. contribution of  
 67 different sectors to the decrease in emissions during COVID-19 epidemic (April to December) in (c) 2020 and war (March to  
 68 December) in (d) 2022; and actual (e) and relative (f) changes in different sectors during COVID-19 epidemic of 2020 and  
 69 war 2022 compared to the baseline year.

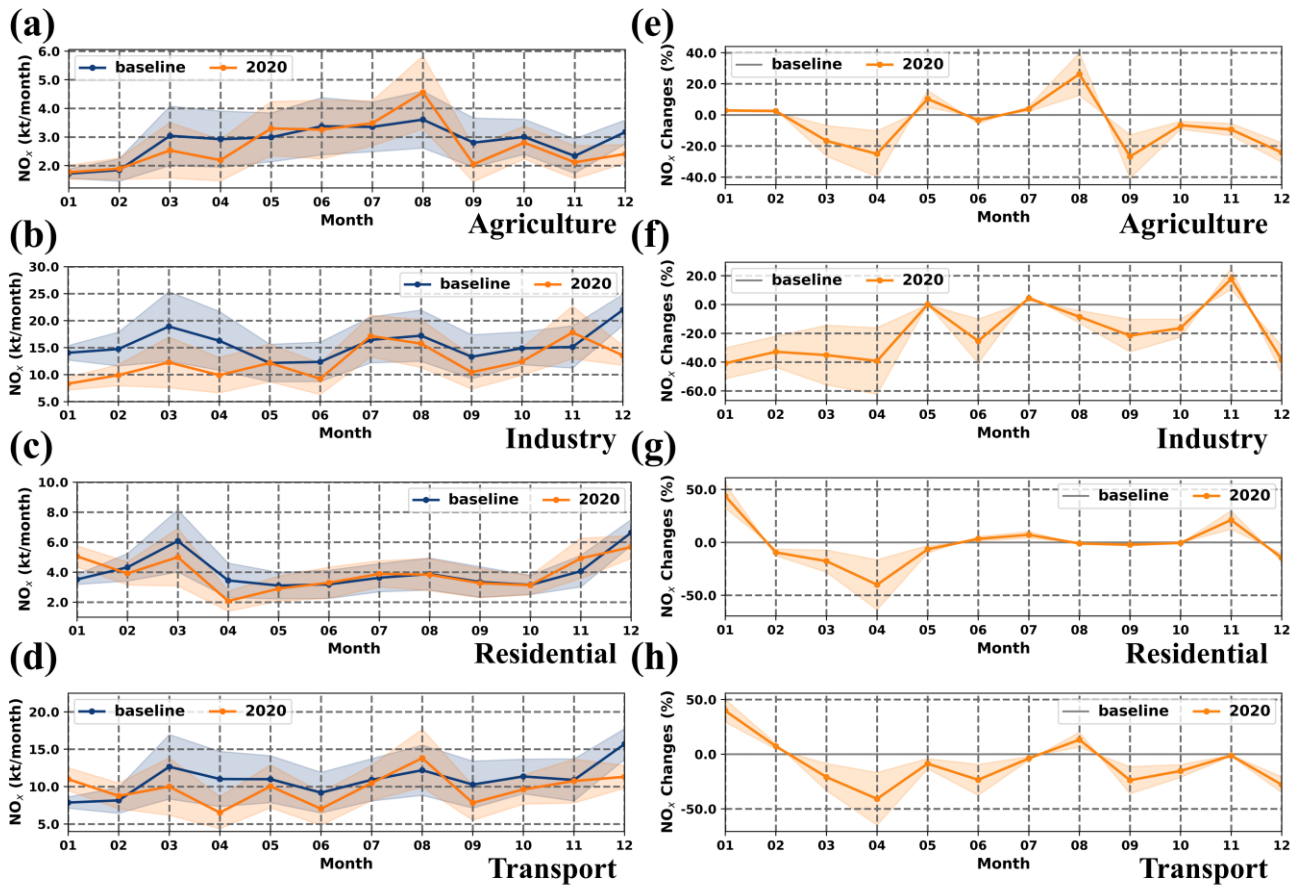

70

71 Fig. S8. Seasonal changes of sectoral  $\text{NO}_x$  emissions in Ukraine in 2020, and the relative changes with baseline year.

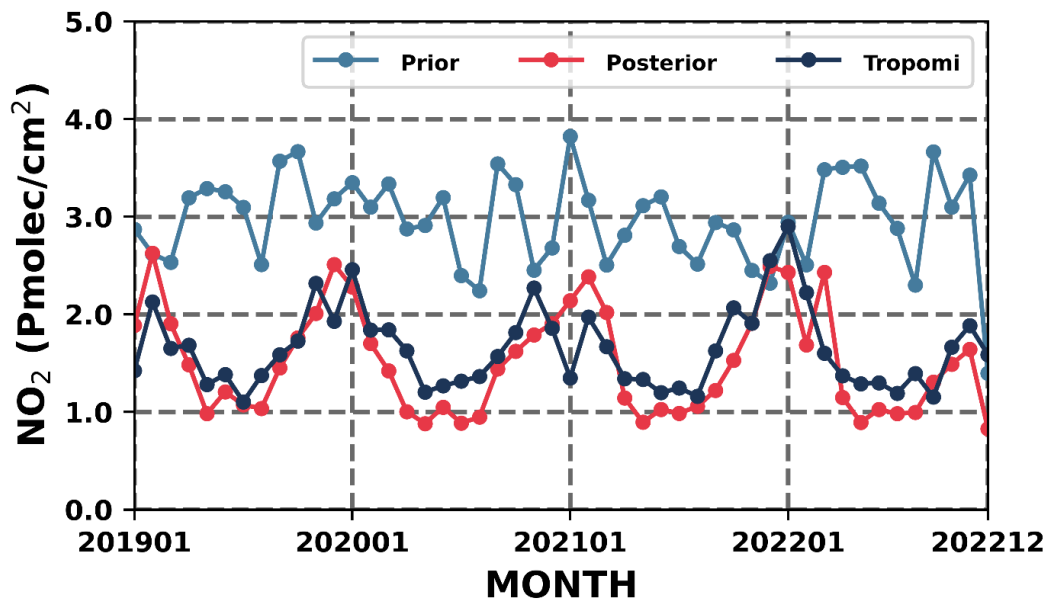

72

73 Fig. S9. Monthly average NO<sub>2</sub> VCDs estimated from the prior and posterior emission inventories versus satellite-  
 74 observed NO<sub>2</sub> VCDs seasonal changes from 2019 to 2022.

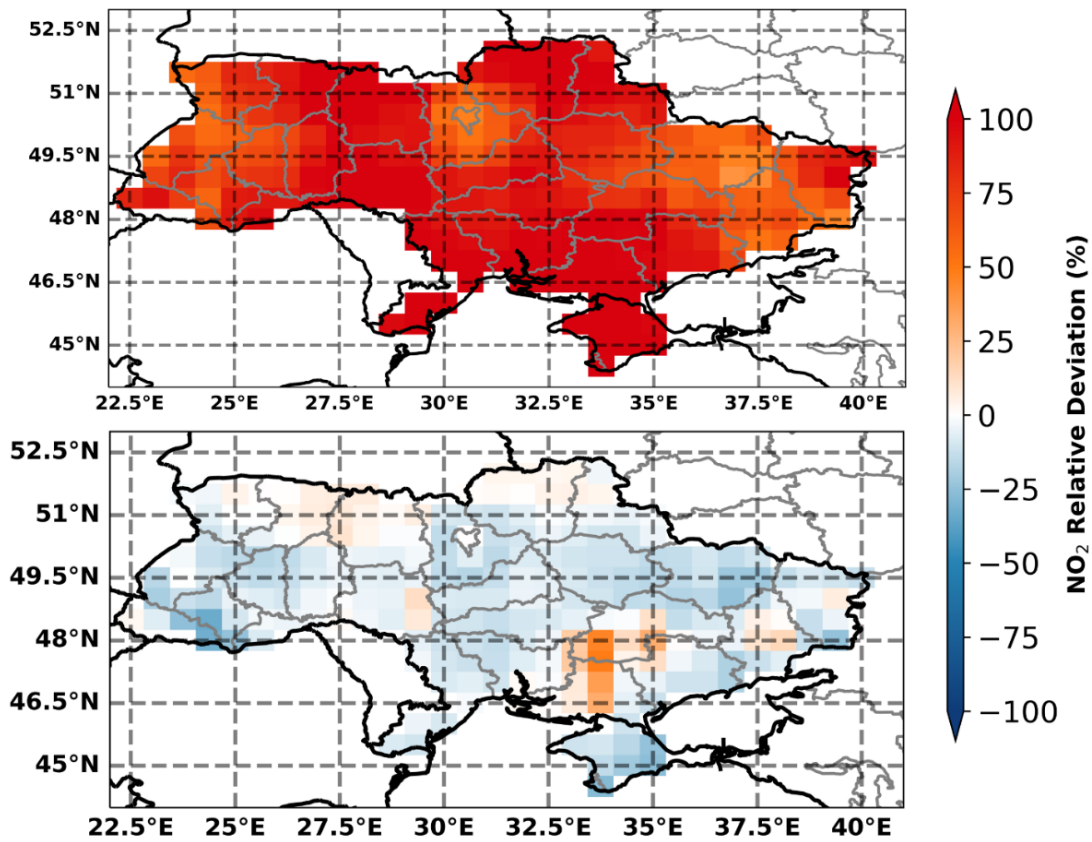

75

76 Fig. S10. Spatial distribution of relative deviations between the prior emissions and inverted the posterior emissions  
 77 modeled NO<sub>2</sub> VCDs and satellite observations.

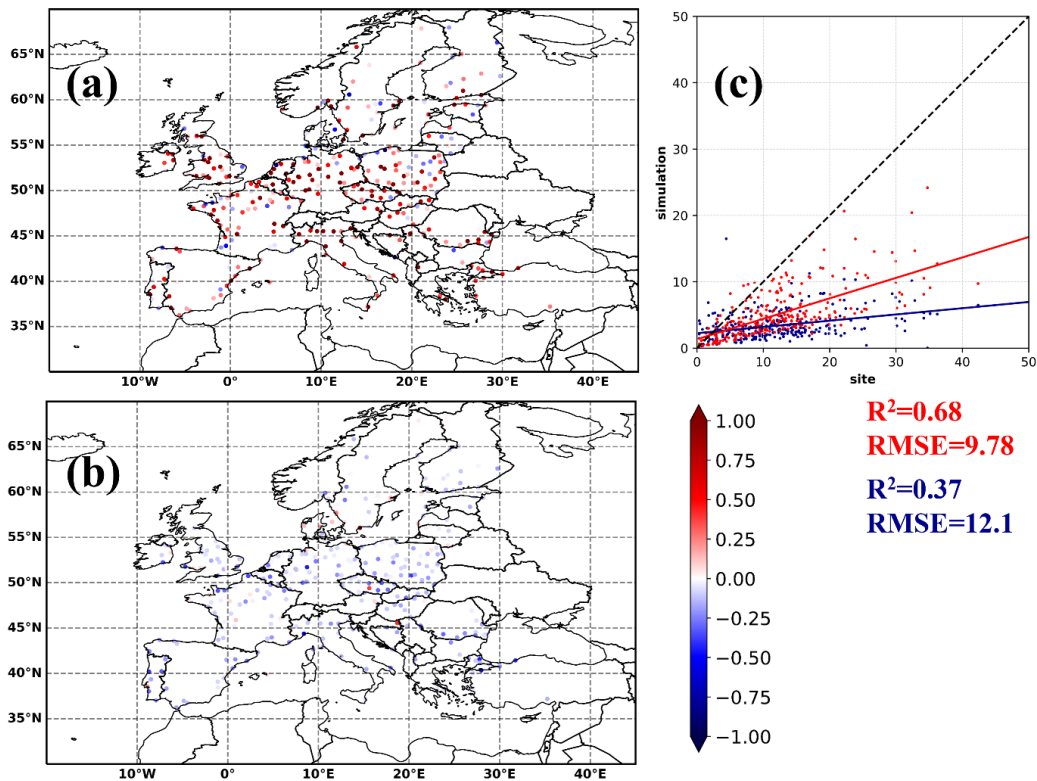

78

79 **Fig. S11. Accuracy of priori and posteriori emission simulated surface concentration with in-suit observations.** (a)  
 80 Relative change in R2 of the time series of in-suit observations to the posterior versus prior simulated surface concentration  
 81 in the corresponding grids ( $(R^2_{\text{posterior}} - R^2_{\text{prior}})/R^2_{\text{prior}}$ ); (b) Relative change in RMSE of the time series of in-suit observations  
 82 to the posterior versus prior simulated surface concentration in the corresponding grids ( $(RMSE_{\text{posterior}} -$   
 83  $RMSE_{\text{prior}})/RMSE_{\text{prior}}$ ); (c) Scatterplot of the linear fit of the time-averaged values of in-suit observations to the priori (blue)  
 84 and posterior (red) simulated concentrations of the corresponding grids.

85

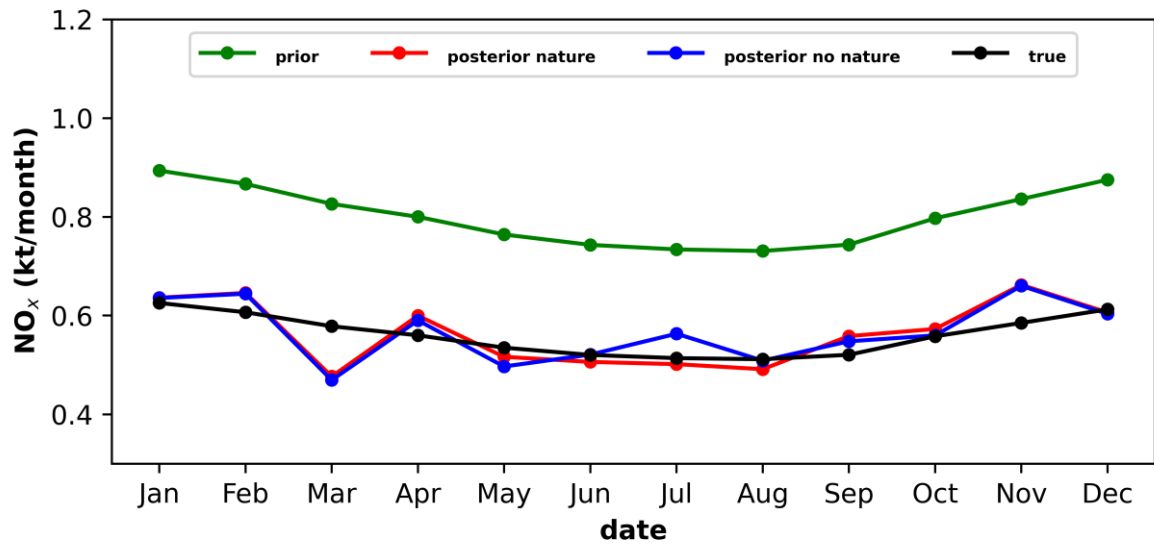

86

87 Fig. S12. Seasonal changes of posterior Ukrainian anthropogenic NO<sub>x</sub> emissions considering natural source emissions (red) versus  
 88 those without natural source emissions (blue) with pseudo-true values (black) and prior (green) emissions in the OSSE test in 2022.

89

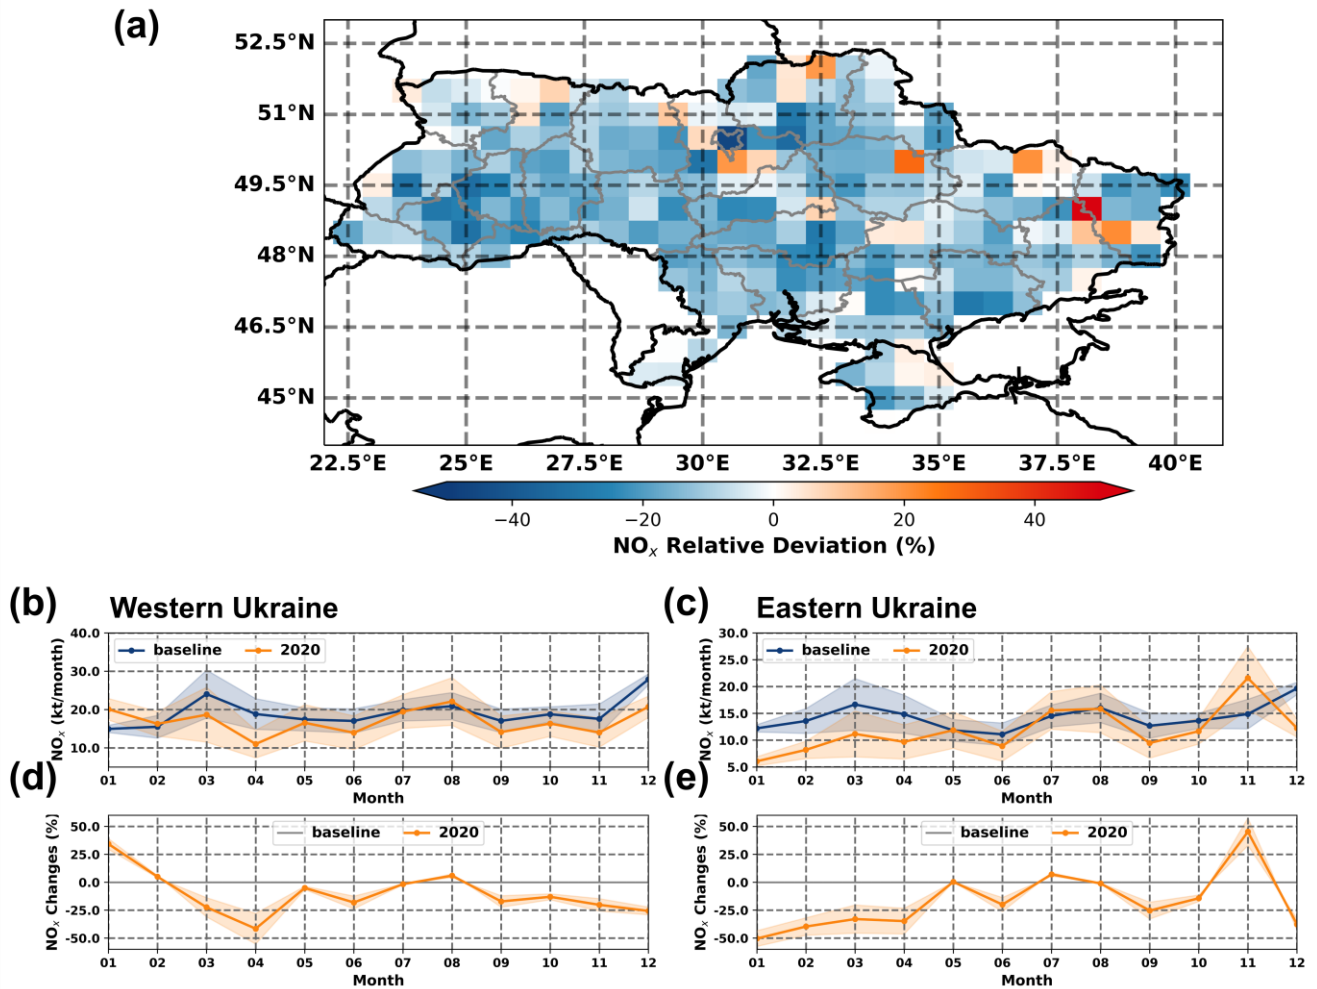

90

91 **Fig. S13. Spatial variation of  $\text{NO}_x$  emissions in Ukraine during the epidemic in 2020.** (a) Spatial distribution of changes  
 92 in total emissions in Ukraine during the epidemic in 2020 relative to the baseline year. And (b) Western Ukraine 's and (c)  
 93 Eastern Ukraine 's Monthly  $\text{NO}_x$  emissions in 2020 compare with the baseline year, and changes in monthly  $\text{NO}_x$  emissions  
 94 in 2020 relative to the baseline year for (d) Western Ukraine and (e) Eastern Ukraine.



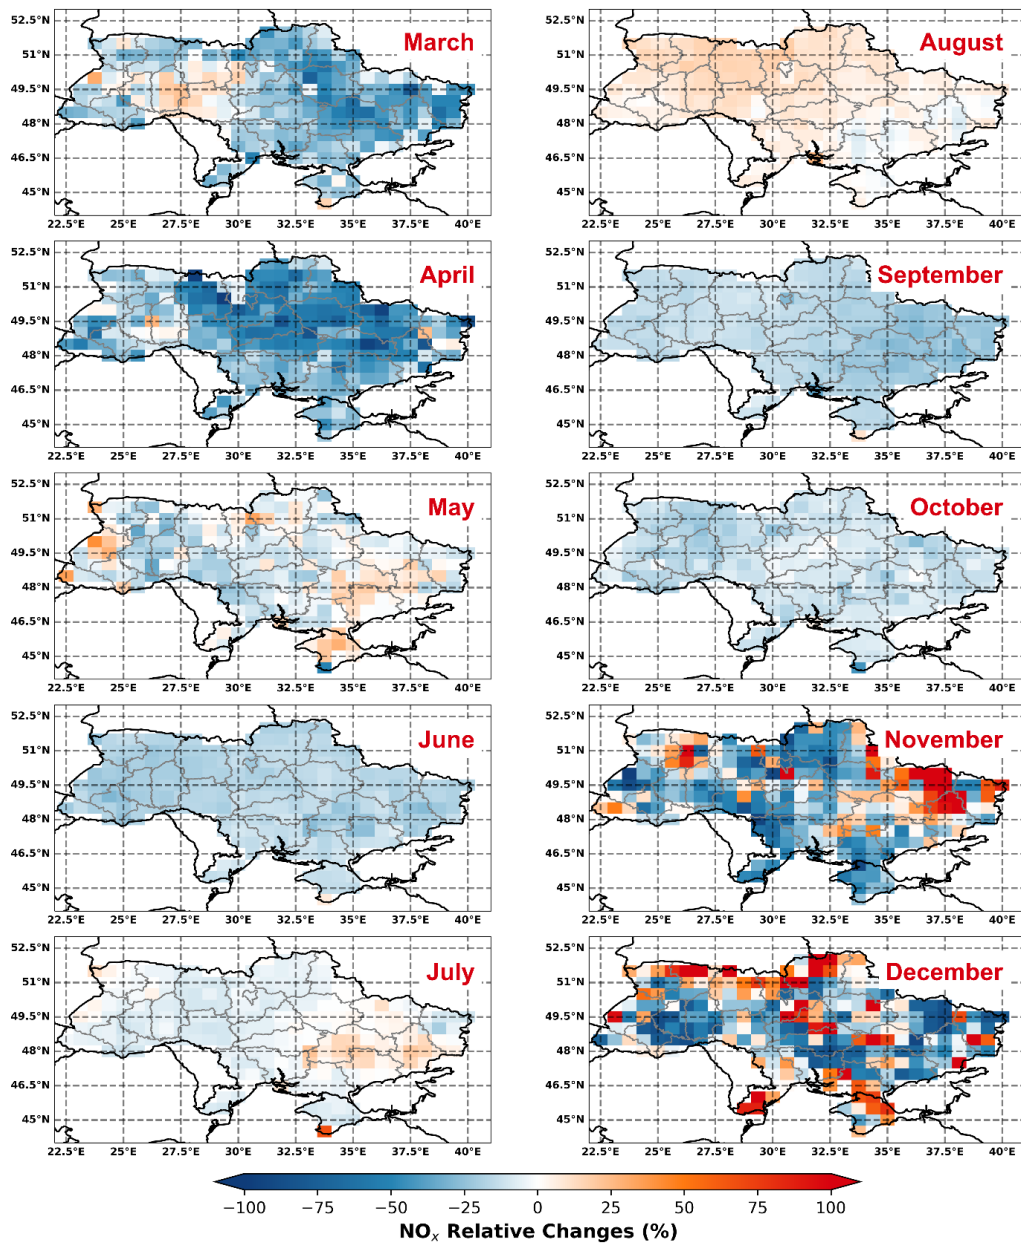

95

96 **Fig. S14. Spatial distribution of monthly NO<sub>x</sub> emission changes in March to December of 2020 relative to the baseline**  
 97 **year.**

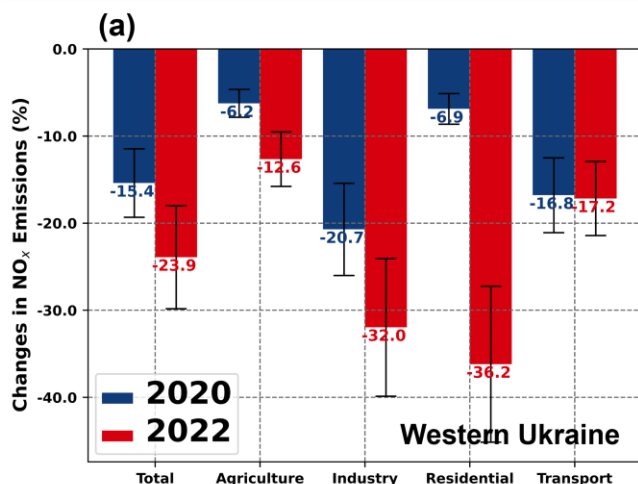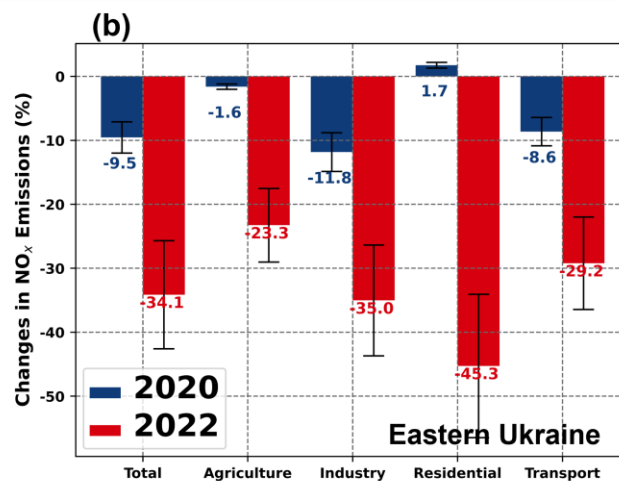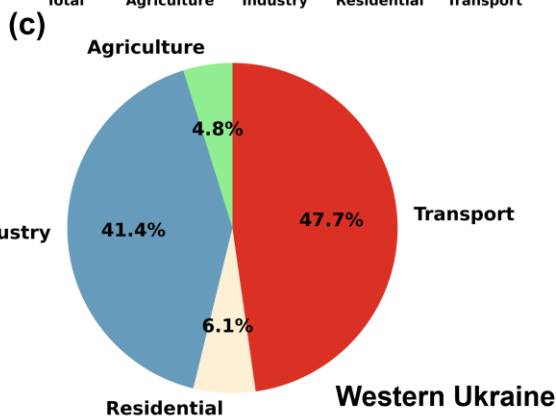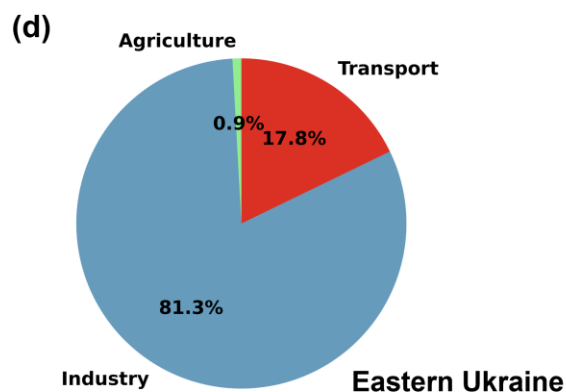

98

99 **Fig. S15. Changes in sectoral emissions during the epidemic of 2020.** Relative changes in (a) Western Ukraine and (b)  
 100 Eastern Ukraine sectoral emissions during the epidemic in 2020 relative to the baseline year; and (c) Western Ukraine and  
 101 (d) Eastern Ukraine sectoral contributions to the decline in emissions during the epidemic in 2020.

102 **SI References**

103 Hoesly, R. M., Smith, S. J., Feng, L., Klimont, Z., Janssens-Maenhout, G., Pitkanen, T., Seibert, J. J., Vu, L., Andres, R. J.,  
 104 Bolt, R. M., Bond, T. C., Dawidowski, L., Kholod, N., Kurokawa, J. I., Li, M., Liu, L., Lu, Z., Moura, M. C. P., O'Rourke, P.  
 105 R., and Zhang, Q.: Historical (1750-2014) anthropogenic emissions of reactive gases and aerosols from the Community  
 106 Emissions Data System (CEDS), *Geosci. Model Dev.*, 11, 369–408, <https://doi.org/10.5194/gmd-11-369-2018>, 2018.

107 Malarvizhi, A. S., Liu, Q., Trefonides, T. S., Hasheminassab, S., Smith, J., Huang, T., Marlis, K. M., Roberts, J. T., Wang,  
 108 Z., Sha, D., Beatriz Moura Pereira, A., Podar, H., Cain, J., and Yang, C.: The spatial dynamics of Ukraine air quality  
 109 impacted by the war and pandemic, *Int. J. Digit. Earth*, 16, 3680–3705, <https://doi.org/10.1080/17538947.2023.2239762>,  
 110 2023.

111 Zheng, B., Geng, G., Ciais, P., Davis, S. J., Martin, R. V., Meng, J., Wu, N., Chevallier, F., Broquet, G., Boersma, F., van  
112 Der, R. A., Lin, J., Guan, D., Lei, Y., He, K., and Zhang, Q.: Satellite-based estimates of decline and rebound in China's CO<sub>2</sub>  
113 emissions during COVID-19 pandemic, *Sci. Adv.*, 6, <https://doi.org/10.1126/sciadv.abd4998>, 2020.

114
